# Supplementary material for: Lesions in the right Rolandic operculum are associated with self-rating affective and apathetic depressive symptoms for post-stroke patients
Source: PubMed Central journal article supplement (PMC7679372; doi:10.1038/s41598-020-77136-5), 2020-11-20
Supplement: 41598_2020_77136_MOESM1_ESM.pdf [file 41598_2020_77136_MOESM1_ESM.pdf]

## **Supplementary Information**

Title : Lesions in the right Rolandic operculum are associated with self-rating affective and apathetic depressive symptoms for post-stroke patients

Authors : Stephanie Sutoko, Hirokazu Atsumori, Akiko Obata, Tsukasa Funane, Akihiko Kandori, Koji Shimonaga, Seiji Hama, Shigeto Yamawaki, and Toshio Tsuji

Supplementary Table S1. Results of Tukey-Kramer *post hoc* analysis (*p*-values).

Bold-written values indicate  $p < 0.1$

| Domains                               | Cluster comparisons |         |              |         |              |              |
|---------------------------------------|---------------------|---------|--------------|---------|--------------|--------------|
|                                       | 1 vs. 2             | 1 vs. 3 | 1 vs. 4      | 2 vs. 3 | 2 vs. 4      | 3 vs. 4      |
| <b>Right Rolandic operculum</b>       |                     |         |              |         |              |              |
| Apathy and depression                 | 0.966               | 0.959   | <b>0.020</b> | 1.000   | <b>0.045</b> | <b>0.050</b> |
| Apathy and anxiety                    | 0.972               | 0.940   | <b>0.025</b> | 0.998   | <b>0.050</b> | <b>0.087</b> |
| Apathy and perceived stress           | 1.000               | 0.998   | <b>0.055</b> | 1.000   | <b>0.025</b> | <b>0.042</b> |
| Depression and anxiety                | 0.991               | 0.999   | <b>0.004</b> | 0.982   | <b>0.019</b> | <b>0.009</b> |
| Depression and perceived stress       | 0.999               | 1.000   | 0.199        | 0.999   | <b>0.047</b> | <b>0.015</b> |
| Anxiety and perceived stress          | 0.997               | 0.999   | 0.116        | 1.000   | <b>0.025</b> | <b>0.017</b> |
| <b>Right inferior occipital gyrus</b> |                     |         |              |         |              |              |
| Apathy and depression                 | 1.000               | 0.839   | 0.109        | 0.766   | <b>0.077</b> | 0.357        |
| Apathy and anxiety                    | 1.000               | 0.783   | 0.125        | 0.696   | <b>0.085</b> | 0.487        |
| Apathy and perceived stress           | 1.000               | 1.000   | <b>0.009</b> | 1.000   | <b>0.006</b> | <b>0.011</b> |
| Depression and anxiety                | 0.586               | 0.999   | <b>0.058</b> | 0.778   | 0.496        | 0.135        |
| Depression and perceived stress       | 1.000               | 0.998   | 0.292        | 0.993   | <b>0.064</b> | <b>0.064</b> |
| Anxiety and perceived stress          | 1.000               | 0.865   | 0.663        | 0.637   | 0.392        | 0.930        |
| <b>Left thalamus</b>                  |                     |         |              |         |              |              |
| Apathy and depression                 | 0.901               | 1.000   | 0.922        | 0.871   | 0.618        | 0.927        |
| Apathy and anxiety                    | 0.971               | 1.000   | 0.943        | 0.981   | 0.779        | 0.927        |
| Apathy and perceived stress           | 0.253               | 0.754   | <b>0.050</b> | 0.891   | 0.728        | 0.397        |
| Depression and anxiety                | 0.455               | 0.802   | 0.547        | 0.970   | 0.999        | 0.955        |
| Depression and perceived stress       | 0.995               | 0.798   | 0.195        | 0.747   | 0.067        | 0.298        |
| Anxiety and perceived stress          | 0.991               | 0.563   | 0.092        | 0.419   | 0.024        | 0.383        |

Supplementary Table S1. continued

| Domains                               | Cluster comparisons |         |              |         |              |              |
|---------------------------------------|---------------------|---------|--------------|---------|--------------|--------------|
|                                       | 1 vs. 2             | 1 vs. 3 | 1 vs. 4      | 2 vs. 3 | 2 vs. 4      | 3 vs. 4      |
| <b>Lobule VIIB of left cerebellum</b> |                     |         |              |         |              |              |
| Apathy and depression                 | 0.903               | 0.998   | <b>0.028</b> | 0.953   | <b>0.097</b> | <b>0.034</b> |
| Apathy and anxiety                    | 0.916               | 0.997   | <b>0.035</b> | 0.972   | 0.103        | <b>0.054</b> |
| Apathy and perceived stress           | 0.869               | 0.977   | 0.359        | 0.990   | 0.727        | 0.620        |
| Depression and anxiety                | 0.608               | 0.994   | <b>0.056</b> | 0.845   | 0.471        | 0.157        |
| Depression and perceived stress       | 1.000               | 0.931   | 0.724        | 0.797   | 0.459        | 0.881        |
| Anxiety and perceived stress          | 0.971               | 0.990   | 0.563        | 0.997   | 0.607        | 0.485        |
